# Supplementary material for: Carbon Dots versus Nano-Carbon/Organic Hybrids—Divergence between Optical Properties and Photoinduced Antimicrobial Activities
Source: MDPI journal article supplement (doi:10.3390/c8040054), 2022-10-20
Supplement: s1 [file s1]

Archive with 1 entries (1 files):
- carbon-1934223-supplementary.pdf
